# Supplementary material for: Comprehensive transcriptome analysis of peripheral blood unravels key lncRNAs implicated in ABPA and asthma
Source: PeerJ. 2021 Jun 24;9:e11453. doi: 10.7717/peerj.11453 (PMC8236232; doi:10.7717/peerj.11453)
Supplement: Supplemental Information 4 [file peerj-09-11453-s004.xlsx]

## Sheet: Sheet 1
		General information					Lung function results					Blood routine results										Induced sputum results					Total and specific IgE results
	Sample	Gender	Age	BMI	Hight	Weight	FVC	FVC(%)	FEV1	FEV1%	FEV1/FVC	neotrophil(10^9/L)	NEO%	Lymphocytes(10^9/L)	LYM%	Monocytes(10^9/L)	Mon%	Eosinophils(10^9/L)	EOS%	Basophils(10^9/L)	BAS%	NEU%	MAC%	EOS%	LYM%	tIgE	d1 (House dust mite)	d1 class	d2 (Dust mite)	d2 class	e1 (cat dander)	e1 class	e5 (dog dander)	e5 class	m1 (Penicillium chrysogenum)	m1 class	m2 (Branching Cinerea)	m2 class	m3 (Aspergillus fumigatus)	m3 class	m5 (Candida albicans)	m5 class	m6 (Alternaria alter)	m6 class	m7 (Botrytis cinerea)	m7 class	w6 (mugwort)	w6 class	f1 (egg white)
ABPA	AB_B3	M	28	23.4738	1.755	72.3	4.53	88.8	2.68	62.4	70	7.4	64.4	2.1	18.4	1.2	10.8	0.7	6	0.04	0.3	NA	NA	NA	NA	358	1.2	2			0	0							9.18	3							0.01	0
	AB_B6	M	60	20.8325	1.61	54	2.65	78.6	1.06	39.3	40	4.8	51.2	3.3	35.4	1.1	12.1	0.1	1	0.02	0.3	NA	NA	NA	NA	5000	37.4	4											4.39	3
	AB_A1	M	39	21.3908	1.58	53.4	3.79	101.1	2.46	77.4	64.86	2	36.8	1.9	35.1	0.5	9.2	1.03	18.8	0.01	0.1	9	84	1	6	5000													8.19	3	6.91	3	4.51	3
	AB_A3	M	25	NA	NA	NA	NA	NA	NA	NA	NA	10.2	79	1.4	10.6	1	7.7	0.33	2.6	0.03	0.2	NA	NA	NA	NA	282									3.31	2			8.11	3	1.23	2	1.26	2
	AB_A4	M	40	19.1327	1.68	54	4.47	104	3.79	106	84.8	NA	NA	NA	NA	NA	NA	NA	NA	NA	NA	49.5	0.5	47.5	2.5	3294											1.44	2	18.1	4	1.42	2	11.2	3	1.26	2
	AB_A5	M	33	17.9817	1.76	55.7	4.37	88	2.24	55	51.3	5.1	61.7	1.7	20.1	0.6	6.9	0.9	10.9	0	0.4	86	0	13.5	0.5	4513													22.3	4
	AB_A6	M	32	25.513	1.735	76.8	3.89	80.7	2.6	64.2	66.75	5	51.9	3.4	35.1	0.8	8.8	0.36	3.8	0.05	0.5	30	67	2.5	0.5	1459	0.16	0	1.35	2	0.04	0	0.12	0					1.15	2			0.35	1					0.09
	AB_B1	M	41	NA	NA	NA	NA	NA	NA	NA	NA	NA	NA	NA	NA	NA	NA	NA	NA	NA	NA	NA	NA	NA	NA	NA
	AB_B4	M	41	NA	NA	NA	NA	NA	NA	NA	NA	NA	NA	NA	NA	NA	NA	NA	NA	NA	NA	NA	NA	NA	NA	NA
	AB_B2	M	34	NA	NA	NA	NA	NA	NA	NA	NA	NA	NA	NA	NA	NA	NA	NA	NA	NA	NA	NA	NA	NA	NA	1003
	AB_B5	M	34	NA	NA	NA	NA	NA	NA	NA	NA	NA	NA	NA	NA	NA	NA	NA	NA	NA	NA	NA	NA	NA	NA	NA
	AB_A7	M	22	15.6321	1.745	47.6	4.09	80.85	3.69	86.05	90.18	3.4	48.1	2.5	35.6	0.6	7.7	0.58	8.1	0.04	0.5	NA	NA	NA	NA	2595													30.1	4
Asthma	As_1	M	46	21.2585	1.68	60	1.62	38.7	0.66	19.2	40.89	8.7	73.9	2	17.2	1	8.2	0	0.4	0	0.3	88.5	9	0.5	2	40.2													1.98	2
	As_2	M	44	25.0399	1.66	69	4.46	109.5	3.29	97.5	73.7	3	49.4	2.3	38.7	0.6	9.8	0.1	1	0.1	1.1	95	3	0.5	1.5	634	100	6	100	6	0.03	0	0.06	0
	As_4	M	49	21.5995	1.72	63.9	3.05	70.1	2.11	59.5	69.2	5.3	53.2	2.6	26.8	1	9.6	0.98	9.9	0.06	0.6	62.6	1.8	35	0.6	32.9
	As_5	M	46	23.3916	1.715	68.8	4.85	110.93	3.73	104.13	76.92	7.5	81.7	1.2	12.4	0.4	4.8	0.05	0.5	0.06	0.6	79	9.5	11.5	0	517
	As_6	M	44	22.2204	1.665	61.6	3.29	80.1	1.52	44.8	46.21	4.2	64.4	1.3	20	0.6	8.6	0.42	6.5	0.04	0.6	47	12	40.5	0.5	826	0.08	0	0.08	0	0.01	0	0.03	0									0.03	0			0.03	0
	As_7	M	41	28.6413	1.665	79.4	2.48	59.3	2.15	61.8	86.64	4	50.3	1.8	22.9	0.6	8	1.38	17.6	0.09	1.2	22	1.8	74.4	1.8	1893	1.51	2	1.53	2	0.02	0	0.05	0					0.03	0			0.04	0
	As_8	M	41	22.526	1.7	65.1	4.6	105.5	3.17	87.9	68.85	7	74.9	1.6	17.3	0.3	17.3	0.36	3.8	0.06	0.6	80	14	5	1	529
Control	HC_1	M	57	NA	NA	NA	NA	NA	NA	NA	NA	NA	NA	NA	NA	NA	NA	NA	NA	NA	NA	NA	NA	NA	NA	NA
	HC_2	M	23	NA	NA	NA	NA	NA	NA	NA	NA	NA	NA	NA	NA	NA	NA	NA	NA	NA	NA	NA	NA	NA	NA	NA
	HC_4	M	35	NA	NA	NA	NA	NA	NA	NA	NA	4.6	49.3	3.8	40.9	0.7	7.4	0.2	1.8	0.1	0.6	NA	NA	NA	NA	NA
	HC_19	M	36	NA	NA	NA	NA	NA	NA	NA	NA	3.6	54.1	2.3	34.7	0.6	9.1	0.1	1.6	0	0.5	NA	NA	NA	NA	NA
	HC_22	M	21	NA	NA	NA	NA	NA	NA	NA	NA	3.5	50	2.6	36.8	0.5	7	0.4	5.9	0	0.3	NA	NA	NA	NA	NA
	HC_23	M	28	NA	NA	NA	NA	NA	NA	NA	NA	NA	NA	NA	NA	NA	NA	NA	NA	NA	NA	NA	NA	NA	NA	NA
	HC_25	M	25	NA	NA	NA	NA	NA	NA	NA	NA	4.1	60.1	1.8	27.3	0.5	8	0.3	3.9	0	0.7	NA	NA	NA	NA	NA
	HC_28	M	24	NA	NA	NA	NA	NA	NA	NA	NA	2.9	57.3	1.6	31.8	0.4	8.6	0.1	1.7	0	0.6	NA	NA	NA	NA	NA
[truncated: 21 more columns]
