# Supplementary material for: Comprehensive transcriptome analysis of peripheral blood unravels key lncRNAs implicated in ABPA and asthma
Source: PeerJ journal article supplement (doi:10.7717/peerj.11453), 2021-06-24
Supplement: Supplementary_Information.pdf [file Supplementary_Information.pdf]

# Supplementary Information

## Comprehensive transcriptome analysis of peripheral blood unravels key lncRNAs implicated in ABPA and asthma

**Chen Huang<sup>1†</sup>, Dongliang Leng<sup>2†</sup>, Peiyan Zheng<sup>3†</sup>, Min Deng<sup>2</sup>, Lu Li<sup>3</sup>, Ge Wu<sup>3</sup>, Baoqing Sun<sup>3\*</sup>, Xiaohua Douglas Zhang<sup>2\*</sup>**

<sup>1</sup> Dr. Neher's Biophysics Laboratory for Innovative Drug Discovery, Macau University of Science and Technology, Macau, SAR, China

<sup>2</sup> CRDA, Faculty of Health Sciences, University of Macau, Taipa, Macau

<sup>3</sup> Department of Allergy and Clinical Immunology, State Key Laboratory of Respiratory Disease, National Clinical Research Center of Respiratory Disease, Guangzhou Institute of Respiratory Health, First Affiliated Hospital of Guangzhou Medical University, Guangzhou, Guangdong, China

<sup>4</sup> Stat Key laboratory of Quality Research in Chinese Medicine, Macau Institute For Applied Research in Medicine and Health, Macau University of Science and Technology, Macau, SAR, China

<sup>†</sup>These authors contributed equally to this work

\*Correspondence: Xiaohua Douglas Zhang [douglaszhang@um.edu.mo](mailto:douglaszhang@um.edu.mo)

## Supplementary Methods

### Transcriptome variations analysis

For SNPs and INDELs, Genome Analysis Toolkit (GATK) analysis pipeline was used. Briefly, the alignment outputs (bam files) were processed using Picard for marking duplicates and sorting alignment results. Then the indel realignment and base recalibration were performed for preparation of variant calling. Finally, SNPs and INDELs (vcf files) were detected and filtered.

Variant annotation was conducted by SnpEff (4.3t) and annovar.

Then we used statistical hypotheses to investigate whether there were significant differences in the observed proportion of SNPs and INDELs among populations ABPA, asthma and healthy control. However, with the total samples is small, it seems not persuasive to find genetic differences based on the statistical hypotheses test. To settle this issue, we performed the statistical power analysis between different groups to filter the raw annotated variants. After deleting the variants with the power adequately less than 0.8, we conducted the hypotheses test on the remaining data. Concretely, we employed Fisher Exact probability test to compare the selected variation ratios between two different groups under the significant level  $\alpha = 0.05$  since Fisher Exact probability test is reported to be appropriate for comparing proportions when sample size is small.  $P_{ABPA}$ ,  $P_{asthma}$ , and  $P_{hc}$  were used to denote the proportions of variants

in populations ABPA, asthma and healthy control, respectively. To detect the difference between group ABPA and asthma, the corresponding hypotheses to test are as follows:

$H_0: P_{ABPA} = P_{asthma}$  versus  $H_1: P_{ABPA} \neq P_{asthma}$ . If P-value < 0.05, the null hypothesis  $H_0$  is rejected, which means the proportions of variants are significantly different between group ABPA and asthma. Similarly, to investigate whether the proportions of variants are the same in populations ABPA and healthy control, asthma and healthy control, testing hypotheses were established accordingly.

For Simple sequence repeats (SSRs) detection, the Perl script of MISA–MicroSATellite identification tool (<http://pgrc.ipk-gatersleben.de/misa/>) with default parameters was used, which could yield six distinct types of SSRs, including mono-nucleotide, di-nucleotide, tri-nucleotide, tetra-nucleotide, penta-nucleotide and hexa-nucleotide. We identified that each type of SSRs repeats 5~90 times. Then with fixed numbers of repeat, we exploited statistical hypotheses to investigate whether there were significant mean differences in the total numbers of SSRs with the statistical power equals to or greater than 0.8 among group ABPA, asthma and healthy control. For example, When the repeats = 5, we want to study the mean differences between the group ABPA and asthma, thus we have the following procedures to test the null hypothesis:  $H_0: \mu_{ABPA} = \mu_{asthma}$  under significant level  $\alpha = 0.05$ ,

- Use Shapiro-Wilk normality test to validate that the raw data from each of the two groups follows normal distribution;

- If the raw data follows normal distribution, use Welch t-test to obtain P-value ( $P_t$ ), we can conclude that the mean values of group ABPA and asthma are significantly different when the  $P_t < 0.05$ ;
- If the raw data is not normally distributed, use log-transformation to normalize the raw data. If normalized data follows the normal distribution, use Welch t-test to calculate P-value ( $P_t$ ); If the normalized data is not normally distributed, it is recommended to use Wilcoxon rank test to obtain P-values ( $P_w$ ) subsequently, then the mean values of group ABPA and asthma are considered significantly different if  $P_w < 0.05$ .
- Shapiro-Wilk normality test is not applicable when the raw data are identical in the testing groups. When this happens, use Wilcoxon rank test to acquire the determining P-value.

The whole statistic-test pipeline is visualized in Figure 3-A. Using the above statistical inference process, the testing hypotheses disclose whether the means are the same in populations ABPA vs health control, and populations asthma vs health control. Similarly, it is capable of doing similar analyses for each fixed-number SSR repeats.

### **Differential interaction network analysis**

To perform differential interaction network analysis, an initial network was constructed for each group (ABPA, asthma and healthy controls). For each network, the correlation between

the differentially expressed transcripts and remaining transcripts (including mRNA-lncRNA, mRNA-mRNA and lncRNA-lncRNA) was assessed using Pearson Correlation Coefficient (PCC) algorithm based on the normalized expression profile via in-house R script. Then the difference of network between ABPA and health controls, as well as asthma and healthy controls were assessed by three criteria accordingly. This step generated three sub-networks for each group, including loss-of-function network ( $|PCC_{\text{healthy}}| \geq 0.7$  &  $P\text{-value}_{\text{healthy}} < 0.05$  &  $|PCC_{\text{disease}}| \leq 0.30$ ), gain-of-function network ( $|PCC_{\text{healthy}}| \leq 0.30$  &  $|PCC_{\text{disease}}| \geq 0.80$  &  $P\text{-value}_{\text{disease}} < 0.05$ ), and anti-function network ( $|PCC_{\text{healthy}}| \geq 0.50$  &  $|PCC_{\text{disease}}| \geq 0.50$  &  $|PCC_{\text{healthy}} - PCC_{\text{disease}}| > 1$ ). Among these sub-networks, the interaction pairs which contained the transcripts significantly enriched in immune-related processes were retained. Subsequently, topological analysis was performed for each sub-network with cytoHubba V0.1 (36) plugin in Cytoscape V3.6.1 to detect key mRNAs and lncRNAs (hub nodes). 12 different algorithms of cytoHubba generated 12 hub node datasets. We selected the top 20 hub nodes from each algorithm after sorting by score. Finally, nodes with count frequencies higher than 2 in the 240-node set were regarded as highly confident hub nodes.

For the visualization of three immune-related sub-networks, more stringent filtering criteria were utilized as follows: 1) loss-of- immune-related-function network in ABPA:  $|PCC_{\text{healthy}}| \geq 0.95$  &  $P\text{-value}_{\text{healthy}} < 0.05$  &  $|PCC_{\text{ABPA}}| \leq 0.30$  &  $|PCC_{\text{healthy}} - PCC_{\text{ABPA}}| > 1.00$ ; 2) gain-of-immune-related-function network in ABPA:  $|PCC_{\text{healthy}}| \leq 0.30$  &  $|PCC_{\text{ABPA}}| \geq 0.80$  &  $P\text{-value}_{\text{ABPA}} < 0.05$ .

$\text{value}_{\text{ABPA}} < 0.05$  &  $|\text{PCC}_{\text{healthy}} - \text{PCC}_{\text{ABPA}}| > 1$ ; 3) anti- immune-related-function network in  
 ABPA:  $|\text{PCC}_{\text{healthy}}| \geq 0.70$  &  $|\text{PCC}_{\text{ABPA}}| \geq 0.70$  &  $|\text{PCC}_{\text{healthy}} - \text{PCC}_{\text{ABPA}}| > 1$ ; 4) loss-of- immune-  
 related-function network in asthma:  $|\text{PCC}_{\text{healthy}}| \geq 0.93$  &  $\text{P-value}_{\text{healthy}} < 0.05$  &  $|\text{PCC}_{\text{asthma}}| \leq$   
 $0.30$  &  $|\text{PCC}_{\text{healthy}} - \text{PCC}_{\text{asthma}}| > 1.00$ ; 2) gain-of- immune-related-function network in asthma:  
 $|\text{PCC}_{\text{healthy}}| \leq 0.30$  &  $|\text{PCC}_{\text{asthma}}| \geq 0.90$  &  $\text{P-value}_{\text{asthma}} < 0.05$  &  $|\text{PCC}_{\text{healthy}} - \text{PCC}_{\text{asthma}}| > 1$ ; 3)  
 anti- immune-related-function network in asthma:  $|\text{PCC}_{\text{healthy}}| \geq 0.70$  &  $|\text{PCC}_{\text{ABPA}}| \geq 0.70$  &  
 $|\text{PCC}_{\text{healthy}} - \text{PCC}_{\text{asthma}}| > 1$ .

For the integrated network of two diseases, we used permutation test to validate the significance  
 of final hub nodes. Initially, we randomly perturbed all the interactions in the real network for  
 1000 times, which yielded 1000 pseudo networks. Likewise, we used 12 algorithms of  
 cytoHubba to detect hub nodes and sort them from the top 20 hub nodes of each algorithm, the  
 nodes with count frequencies higher than 2 in the 240-node set were used to compare to the real  
 hub nodes.

Supplementary Figures and Tables

Figure S1. Basic statistics of variants annotated by annovar across 27 samples.

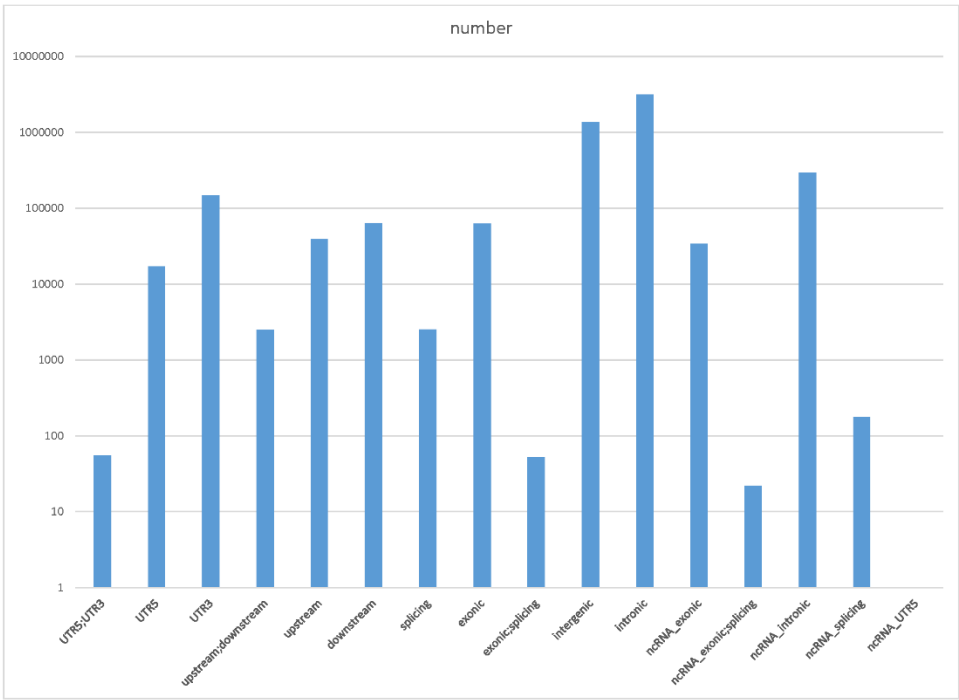

**Figure S2. The mRNAs/lncRNAs architecture of the common immune-related functional network in ABPA and asthma.** Three different dotted lines represents the common interaction pairs in three different types of networks between two diseases: loss-of-function network, gain-of-function network and anti-function network. All the interaction pairs were categorized into four immune-related groups according to their GO functional enrichment results.

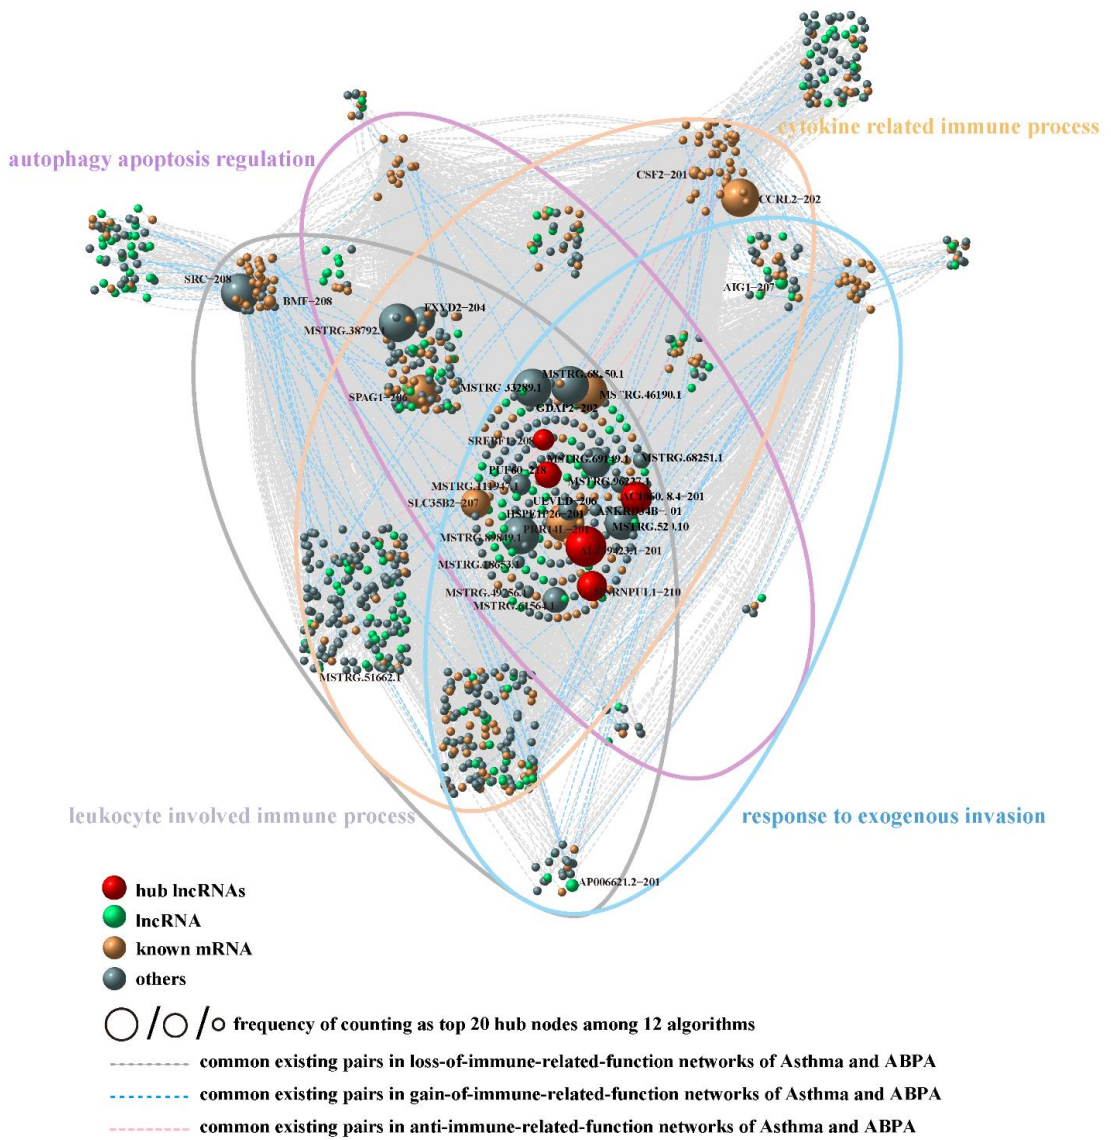



Table S1. Clinical staging of ABPA and asthma in the included patients.

| Group  | Patient | Stage        |
|--------|---------|--------------|
| ABPA   | AB_A1   | Acute        |
|        | AB_A3   | Acute        |
|        | AB_A4   | Acute        |
|        | AB_A5   | Exacerbation |
|        | AB_A6   | Acute        |
|        | AB_A7   | Acute        |
|        | AB_B1   | NA           |
|        | AB_B2   | Response     |
|        | AB_B3   | Acute        |
|        | AB_B4   | NA           |
|        | AB_B5   | Response     |
|        | AB_B6   | acute        |
| Asthma | AS_1    | Exacerbation |
|        | AS_2    | Exacerbation |
|        | AS_4    | Exacerbation |
|        | AS_5    | Chronic      |
|        | AS_6    | Exacerbation |
|        | AS_7    | Exacerbation |
|        | AS_8    | Chronic      |

ABPA staging: **Acute**, the patient is diagnosed as ABPA and features like elevated total as well as *Aspergillus*-specific IgE, radiological abnormalities, peripheral blood eosinophilia, and serum precipitins against *Aspergillus* are present; **Exacerbation**, any clinical and/or radiological worsening along with an increase in IgE level by >50% of baseline; **Response**, clinical as well as radiological improvement associated with at least 25% decline in serum IgE level at 8 weeks of therapy. Asthma staging: **Exacerbation**, progressive exacerbation of shortness of breath, coughing, wheezing, chest tightness, or a combination of the above symptoms, which can be quantified and monitored by lung function tests; **Chronic**, appearance of symptoms (wheezing, shortness of breath, chest tightness, coughing, etc.) at different frequencies and/or different levels every week. ABPA: Allergic bronchopulmonary aspergillosis.

**Table S2. Detailed information of four GEO datasets for lncRNAs and mRNAs validation.**

| <b>GEO dataset</b> | <b>Basic information<br/>(design, sequencing type,<br/>tissue)</b>                              | <b>Sample number</b> | <b>Validation Type</b> | <b>Validated RNA ID</b> |
|--------------------|-------------------------------------------------------------------------------------------------|----------------------|------------------------|-------------------------|
| GSE35571           | asthmatics vs non-asthmatics, microarray, peripheral blood samples                              | 131                  | mRNA                   | ENST00000327423         |
| GSE473             | asthmatics vs non-asthmatics, microarray, CD4+ cells from peripheral blood samples              | 175                  | mRNA                   | GDAP2-202               |
| GSE31773           | severe_asthmatic vs no_severe_asthmatic, microarray, CD4+ T cells from peripheral blood samples | 40                   | lncRNA                 | ENST00000587128         |
| GSE2125            | Smokers vs nonsmokers vs asthmatics, microarray, alveolar macrophages                           | 45                   | lncRNA                 | ENST00000595806         |

**Table S3. Basic statistics of deep RNA sequencing data before and after processing.**

| Sample ID | group | Raw reads   | Raw base       | Q20/Q30                    |             | Clean base     | Q20/Q30                   |  | Mapped reads | Mapped rate (%) |
|-----------|-------|-------------|----------------|----------------------------|-------------|----------------|---------------------------|--|--------------|-----------------|
|           |       |             |                | rate before filtration (%) | Clean reads |                | rate after filtration (%) |  |              |                 |
| AB_B1     | ABPA  | 140,639,534 | 21,095,930,100 | 99.75/95.02                | 136,247,784 | 19,750,718,680 | 100.00/97.94              |  | 91,626,316   | 84.22           |
| AB_B2     | ABPA  | 133,569,324 | 20,035,398,600 | 99.74/94.85                | 129,160,154 | 18,715,070,738 | 100.00/97.86              |  | 91,642,070   | 84.44           |
| AB_B3     | ABPA  | 128,610,498 | 19,291,574,700 | 99.53/92.76                | 121,402,388 | 17,242,172,432 | 100.00/97.93              |  | 91,268,320   | 77.30           |
| AB_B4     | ABPA  | 147,910,528 | 22,186,579,200 | 99.55/92.84                | 139,845,388 | 19,862,784,448 | 100.00/97.91              |  | 96,695,720   | 85.36           |
| AB_B5     | ABPA  | 142,796,748 | 21,419,512,200 | 99.57/93.51                | 136,401,698 | 19,163,991,174 | 100.00/97.47              |  | 118,973,560  | 87.32           |
| AB_B6     | ABPA  | 113,650,690 | 17,047,603,500 | 99.17/91.67                | 106,818,322 | 15,010,538,922 | 100.00/96.91              |  | 111,709,238  | 86.49           |

|              |         |             |                |             |             |                |              |             |       |
|--------------|---------|-------------|----------------|-------------|-------------|----------------|--------------|-------------|-------|
| <b>AB_A1</b> | ABPA    | 110,664,956 | 16,599,743,400 | 99.28/92.04 | 104,892,772 | 14,816,854,370 | 100.00/97.15 | 83,357,458  | 68.66 |
| <b>AB_A3</b> | ABPA    | 114,963,760 | 17,244,564,000 | 99.16/91.48 | 107,899,962 | 15,186,928,606 | 100.00/96.88 | 111,897,118 | 80.01 |
| <b>AB_A4</b> | ABPA    | 116,145,080 | 17,421,762,000 | 99.35/91.29 | 108,797,132 | 15,233,514,448 | 100.00/96.73 | 110,207,150 | 80.80 |
| <b>AB_A5</b> | ABPA    | 115,501,638 | 17,325,245,700 | 99.33/91.00 | 108,526,074 | 15,131,170,954 | 100.00/96.73 | 95,095,462  | 90.66 |
| <b>AB_A6</b> | ABPA    | 126,609,044 | 18,991,356,600 | 99.25/91.26 | 118,072,948 | 16,277,108,454 | 100.00/97.09 | 88,640,084  | 82.15 |
| <b>AB_A7</b> | ABPA    | 120,662,504 | 18,099,375,600 | 99.45/91.18 | 113,284,226 | 16,146,876,256 | 100.00/96.80 | 92,956,128  | 87.02 |
| <b>As_1</b>  | AS      | 157,397,512 | 23,609,626,800 | 99.72/94.70 | 151,907,042 | 21,927,907,770 | 100.00/97.81 | 96,572,818  | 84.03 |
| <b>As_2</b>  | AS      | 113,162,249 | 19,639,849,205 | 99.44/93.18 | 30,552,274  | 4,447,957,232  | 100.00/98.18 | 124,022,850 | 81.64 |
| <b>As_4</b>  | AS      | 123,229,582 | 18,484,437,300 | 99.29/90.89 | 114,920,908 | 16,094,794,128 | 100.00/96.56 | 26,269,506  | 85.98 |
| <b>As_5</b>  | AS      | 116,605,214 | 17,490,782,100 | 99.26/91.14 | 108,547,596 | 15,106,245,636 | 100.00/96.97 | 92,102,902  | 84.85 |
| <b>As_6</b>  | AS      | 131,709,112 | 19,756,366,800 | 99.28/91.41 | 123,041,210 | 17,133,966,112 | 100.00/97.06 | 103,081,148 | 83.78 |
| <b>As_7</b>  | AS      | 128,374,384 | 19,256,157,600 | 99.34/91.62 | 120,007,346 | 16,510,801,698 | 100.00/97.15 | 87,036,380  | 72.53 |
| <b>As_8</b>  | AS      | 139,095,408 | 20,864,311,200 | 99.51/91.84 | 131,143,780 | 18,768,426,602 | 100.00/97.03 | 115,931,322 | 88.40 |
| <b>HC_1</b>  | Healthy | 151,397,014 | 22,709,552,100 | 99.77/95.26 | 146,931,478 | 21,349,804,756 | 100.00/98.02 | 131,185,634 | 89.28 |
| <b>HC_2</b>  | Healthy | 144,001,122 | 21,600,168,300 | 99.75/94.59 | 139,158,410 | 20,110,822,056 | 100.00/98.01 | 119,763,746 | 86.06 |
| <b>HC_4</b>  | Healthy | 164,485,936 | 24,672,890,400 | 99.64/92.81 | 154,144,788 | 22,045,298,224 | 100.00/97.93 | 136,237,618 | 88.38 |
| <b>HC_19</b> | Healthy | 139,564,308 | 20,934,646,200 | 99.18/91.60 | 131,105,060 | 18,417,212,460 | 100.00/96.87 | 113,465,560 | 86.55 |
| <b>HC_22</b> | Healthy | 137,440,108 | 20,616,016,200 | 99.12/91.30 | 128,643,068 | 18,096,858,012 | 100.00/96.80 | 108,655,078 | 84.46 |
| <b>HC_23</b> | Healthy | 101,018,208 | 15,152,731,200 | 99.23/91.55 | 93,494,474  | 13,204,896,592 | 100.00/96.86 | 71,753,898  | 76.75 |
| <b>HC_25</b> | Healthy | 116,540,484 | 17,481,072,600 | 99.40/92.30 | 110,611,886 | 15,471,599,552 | 100.00/97.31 | 48,355,508  | 43.72 |
| <b>HC_28</b> | Healthy | 134,612,054 | 20,191,808,100 | 99.43/92.92 | 128,187,652 | 18,228,363,894 | 100.00/97.33 | 109,757,760 | 85.62 |

---

**Table S4. Basic statistics for all of variants occurred in three groups.**

|              | <b>Healthy</b> | <b>ABPA</b> | <b>AS</b>  |
|--------------|----------------|-------------|------------|
| <b>SNP</b>   | 30,097,904     | 68,013,768  | 15,584,016 |
| <b>INDEL</b> | 3,685,704      | 8,093,796   | 1,916,432  |

**Table S5. Basic statistics of variants occurred in genic region annotated by annovar.**

| <b>Variant type</b>     | <b>number</b> |
|-------------------------|---------------|
| Synonymous SNV          | 26,911        |
| nonsynonymous SNV       | 29,078        |
| frameshift deletion     | 3,150         |
| frameshift insertion    | 1,403         |
| nonframeshift deletion  | 733           |
| nonframeshift insertion | 288           |
| stopgain                | 727           |
| stoploss                | 71            |
| unknown                 | 372           |

**Table S6. Basic statistics for SSR occurred in ABPA, asthma patients and health controls.**

| <b>SSR</b>                      | <b>Healthy</b> | <b>ABPA</b> | <b>AS</b> |
|---------------------------------|----------------|-------------|-----------|
| <b>mono-nucleotides repeats</b> |                |             |           |
| <b>A/T</b>                      | 1,059,279      | 1,729,494   | 749,768   |
| <b>C/G</b>                      | 9,476          | 14,557      | 6,381     |
| <b>di-nucleotide repeats</b>    |                |             |           |
| <b>AC/GT</b>                    | 114,831        | 191,895     | 82,069    |
| <b>AG/CT</b>                    | 45,352         | 76,238      | 30,609    |
| <b>CG/CG</b>                    | 1,345          | 2,185       | 977       |
| <b>AT/AT</b>                    | 37,774         | 66,099      | 28,202    |
| <b>tri-nucleotide</b>           |                |             |           |
| <b>AGG/CCT</b>                  | 6,177          | 9,970       | 4,523     |
| <b>AGC/CTG</b>                  | 5,617          | 8,641       | 4,204     |
| <b>ACG/CGT</b>                  | 116            | 192         | 93        |
| <b>CCG/CGG</b>                  | 8,360          | 12,345      | 5,884     |
| <b>AAT/ATT</b>                  | 18,578         | 30,059      | 12,371    |
| <b>ACT/AGT</b>                  | 604            | 1,016       | 440       |
| <b>AAC/GTT</b>                  | 20,089         | 32,701      | 13,866    |
| <b>AAG/CTT</b>                  | 4,250          | 7,144       | 2,906     |
| <b>ATC/ATG</b>                  | 3,670          | 6,030       | 2,656     |
| <b>ACC/GGT</b>                  | 2,638          | 4,610       | 1,869     |
| <b>tetra-nucleotide</b>         |                |             |           |
| <b>AAAT/ATTT</b>                | 23,065         | 36,919      | 15,653    |
| <b>AAAG/CTTT</b>                | 7,492          | 13,423      | 5,267     |
| <b>AGAT/ATCT</b>                | 3,145          | 5,364       | 2,141     |
| <b>AAGG/CCTT</b>                | 3,437          | 6,011       | 1,943     |
| <b>AAAC/GTTT</b>                | 13,931         | 22,896      | 9,479     |
| <b>others</b>                   | 11,834         | 19,287      | 8,035     |
| <b>penta-nucleotide</b>         |                |             |           |
| <b>AAAAC/GTTTT</b>              | 5,916          | 9,642       | 4,144     |
| <b>AAAAT/ATTTT</b>              | 2,934          | 4,802       | 2,024     |
| <b>AATGG/ATTCC</b>              | 1,938          | 3,818       | 967       |
| <b>AAAAG/CTTTT</b>              | 1,340          | 2,288       | 916       |

|                        |       |       |       |
|------------------------|-------|-------|-------|
| <b>Others</b>          | 2,135 | 3,517 | 1,302 |
| <b>hexa-nucleotide</b> |       |       |       |
| <b>AAAAAT/ATTTTT</b>   | 116   | 203   | 88    |
| <b>AGATAT/ATATCT</b>   | 110   | 171   | 78    |
| <b>AAAAAC/GTTTTT</b>   | 530   | 885   | 381   |
| <b>others</b>          | 969   | 1621  | 608   |

**Table S7. Hub nodes of three sub-networks implicated in ABPA.**

| Transcript ID                | Gene name      | Type   | Differential expression of regulation | frequency of counting as top 20 hub nodes among 12 algorithms | Type of sub-network |
|------------------------------|----------------|--------|---------------------------------------|---------------------------------------------------------------|---------------------|
| MSTRG.112085.1               | MSTRG.112085.1 | other  | UP                                    | 9                                                             | anti                |
| ENST00000462143              | RGS3-210       | mRNA   | DOWN                                  | 9                                                             | anti                |
| ENST00000309180              | GPR171-201     | mRNA   | UP                                    | 8                                                             | anti                |
| ENST00000233190              | NDUFS1-201     | mRNA   | UP                                    | 8                                                             | anti                |
| ENST00000455833              | IFFO2-203      | mRNA   | DOWN                                  | 7                                                             | anti                |
| ENST00000261250              | C12orf4-201    | mRNA   | UP                                    | 7                                                             | anti                |
| ENST00000256458              | IRAK2-201      | mRNA   | DOWN                                  | 7                                                             | anti                |
| MSTRG.31676.1                | MSTRG.31676.1  | other  | UP                                    | 6                                                             | anti                |
| ENST00000583313              | RBM8A-204      | mRNA   | UP                                    | 6                                                             | anti                |
| ENST00000562609 <sup>3</sup> | GTF3C1-203     | lncRNA | DOWN                                  | 6                                                             | anti                |
| ENST00000518462 <sup>3</sup> | REPIN1-216     | other  | DOWN                                  | 6                                                             | anti                |
| ENST00000493352              | MCM7-212       | lncRNA | DOWN                                  | 6                                                             | anti                |
| ENST00000399022              | RPRD1A-202     | mRNA   | UP                                    | 6                                                             | anti                |
| ENST00000380172              | MTAP-201       | mRNA   | UP                                    | 6                                                             | anti                |
| ENST00000373664              | RBL1-202       | mRNA   | UP                                    | 6                                                             | anti                |
| ENST00000286298              | SLC26A2-201    | mRNA   | UP                                    | 6                                                             | anti                |
| ENST00000378380              | ANKEF1-201     | mRNA   | UP                                    | 5                                                             | anti                |
| ENST00000267199              | VPS33A-201     | mRNA   | UP                                    | 5                                                             | anti                |
| MSTRG.91122.1 <sup>3</sup>   | MSTRG.91122.1  | other  | DOWN                                  | 4                                                             | anti                |
| MSTRG.4929.1 <sup>+</sup>    | MSTRG.4929.1   | other  | UP                                    | 4                                                             | anti                |
| MSTRG.18411.9 <sup>1</sup>   | MSTRG.18411.9  | other  | UP                                    | 4                                                             | anti                |
| MSTRG.13021.1 <sup>+</sup>   | MSTRG.13021.1  | other  | UP                                    | 4                                                             | anti                |
| ENST00000511180              | NDUFA13-205    | lncRNA | DOWN                                  | 4                                                             | anti                |
| ENST00000496912 <sup>3</sup> | TES-211        | lncRNA | DOWN                                  | 4                                                             | anti                |
| ENST00000487863 <sup>1</sup> | ZNF808-206     | mRNA   | UP                                    | 4                                                             | anti                |
| MSTRG.84188.1 <sup>1</sup>   | MSTRG.84188.1  | other  | UP                                    | 3                                                             | anti                |
| MSTRG.66739.1                | MSTRG.66739.1  | other  | DOWN                                  | 3                                                             | anti                |
| MSTRG.6235.1                 | MSTRG.6235.1   | other  | UP                                    | 3                                                             | anti                |
| MSTRG.58508.1                | MSTRG.58508.1  | other  | DOWN                                  | 3                                                             | anti                |
| MSTRG.22677.1                | MSTRG.22677.1  | lncRNA | UP                                    | 3                                                             | anti                |

|                              |                |        |      |   |      |
|------------------------------|----------------|--------|------|---|------|
| MSTRG.20512.1                | MSTRG.20512.1  | other  | DOWN | 3 | anti |
| MSTRG.110931.1 <sup>1</sup>  | MSTRG.110931.1 | other  | UP   | 3 | anti |
| ENST00000637630              | NRIP1-205      | other  | DOWN | 3 | anti |
| ENST00000574274              | SLC43A2-207    | other  | DOWN | 3 | anti |
| ENST00000560141              | TRIM69-207     | other  | UP   | 3 | anti |
| ENST00000500949              | OIP5-AS1-201   | lncRNA | UP   | 3 | anti |
| ENST00000473530              | FCGR2C-204     | other  | UP   | 3 | anti |
| ENST00000465812              | IL1RN-207      | other  | DOWN | 3 | anti |
| ENST00000445132              | CCR2-204       | mRNA   | UP   | 3 | anti |
| ENST00000428670 <sup>+</sup> | ATP2B1-204     | mRNA   | DOWN | 3 | anti |
| ENST00000381647 <sup>+</sup> | C5orf51-201    | mRNA   | UP   | 3 | anti |
| ENST00000374242              | INIP-203       | mRNA   | UP   | 3 | anti |
| ENST00000304625              | RNASE2-201     | mRNA   | UP   | 3 | anti |
| ENST00000248248              | MON1B-201      | mRNA   | UP   | 3 | anti |
| MSTRG.51584.8                | MSTRG.51584.8  | other  | DOWN | 8 | lost |
| MSTRG.33289.1                | MSTRG.33289.1  | other  | DOWN | 8 | lost |
| MSTRG.57029.1                | MSTRG.57029.1  | other  | DOWN | 7 | lost |
| ENST00000525836              | DSCAML1-202    | mRNA   | DOWN | 7 | lost |
| MSTRG.51682.11 <sup>3</sup>  | MSTRG.51682.11 | other  | DOWN | 6 | lost |
| ENST00000602230              | BRD4-211       | other  | DOWN | 6 | lost |
| ENST00000327423              | PRR14L-201     | mRNA   | UP   | 6 | lost |
| MSTRG.96227.1                | MSTRG.96227.1  | other  | DOWN | 5 | lost |
| ENST00000540010              | TRAF1-202      | mRNA   | DOWN | 5 | lost |
| ENST00000465102              | WIPI2-205      | lncRNA | DOWN | 5 | lost |
| ENST00000369443 <sup>+</sup> | GDAP2-202      | mRNA   | UP   | 5 | lost |
| MSTRG.68251.1 <sup>3</sup>   | MSTRG.68251.1  | other  | DOWN | 4 | lost |
| ENST00000562599 <sup>3</sup> | POLR2C-202     | mRNA   | DOWN | 4 | lost |
| ENST00000436788              | MCM9-205       | lncRNA | UP   | 4 | lost |
| MSTRG.22673.1                | MSTRG.22673.1  | lncRNA | UP   | 8 | gain |
| MSTRG.22670.12               | MSTRG.22670.12 | other  | UP   | 8 | gain |
| ENST00000360658              | TLR9-201       | mRNA   | UP   | 8 | gain |
| MSTRG.95648.1 <sup>1</sup>   | MSTRG.95648.1  | other  | UP   | 7 | gain |
| MSTRG.20267.6                | MSTRG.20267.6  | other  | UP   | 7 | gain |
| MSTRG.20192.1                | MSTRG.20192.1  | other  | UP   | 7 | gain |
| ENST00000519975 <sup>1</sup> | PCMTD1-204     | lncRNA | UP   | 7 | gain |
| ENST00000430881              | TNFSF10-203    | mRNA   | UP   | 7 | gain |
| MSTRG.90382.1 <sup>3</sup>   | MSTRG.90382.1  | other  | DOWN | 6 | gain |
| MSTRG.86322.1                | MSTRG.86322.1  | lncRNA | UP   | 6 | gain |



|                            |                |        |      |   |      |
|----------------------------|----------------|--------|------|---|------|
| MSTRG.46039.1              | MSTRG.46039.1  | other  | UP   | 6 | gain |
| MSTRG.45137.1              | MSTRG.45137.1  | other  | UP   | 6 | gain |
| MSTRG.22670.8              | MSTRG.22670.8  | lncRNA | UP   | 6 | gain |
| MSTRG.22674.1              | MSTRG.22674.1  | other  | UP   | 5 | gain |
| MSTRG.110932.1             | MSTRG.110932.1 | other  | UP   | 5 | gain |
| MSTRG.95646.1              | MSTRG.95646.1  | lncRNA | UP   | 4 | gain |
| MSTRG.49797.1 <sup>2</sup> | MSTRG.49797.1  | other  | UP   | 4 | gain |
| MSTRG.37520.12             | MSTRG.37520.12 | other  | UP   | 4 | gain |
| MSTRG.22675.1              | MSTRG.22675.1  | other  | UP   | 4 | gain |
| MSTRG.109428.1             | MSTRG.109428.1 | other  | DOWN | 4 | gain |
| MSTRG.52100.1              | MSTRG.52100.1  | other  | UP   | 3 | gain |
| MSTRG.28293.2 <sup>1</sup> | MSTRG.28293.2  | other  | UP   | 3 | gain |
| MSTRG.27653.1              | MSTRG.27653.1  | other  | UP   | 3 | gain |
| ENST00000428592            | NEU4-210       | mRNA   | DOWN | 3 | gain |

<sup>+</sup>: the transcript belongs to the common hub nodes of immune-related functional network in ABPA and AS.

<sup>1</sup>: the transcript exists in the cluster 3 of cluster analysis in Figure 5A.

<sup>2</sup>: the transcript exists in the cluster 3 of cluster analysis in Figure 5C.

<sup>3</sup>: the transcript exists in the cluster 3 of cluster analysis in Figure 5E.

**Table S8. Hub nodes of three sub-networks implicated in Asthma.**

| Transcript ID                | Gene name      | Type   | Differential expression regulation | frequency of counting as top 20 hub nodes among 12 algorithms | Type of sub-network |
|------------------------------|----------------|--------|------------------------------------|---------------------------------------------------------------|---------------------|
| ENST00000369763              | LRIF1-201      | mRNA   | DOWN                               | 11                                                            | anti                |
| MSTRG.90604.7                | MSTRG.90604.7  | other  | UP                                 | 9                                                             | anti                |
| MSTRG.68296.7                | MSTRG.68296.7  | other  | UP                                 | 8                                                             | anti                |
| ENST00000347635              | NUP50-201      | mRNA   | DOWN                               | 8                                                             | anti                |
| ENST00000562045              | SYNGR3-202     | mRNA   | DOWN                               | 6                                                             | anti                |
| ENST00000560430              | BMF-208        | mRNA   | DOWN                               | 6                                                             | anti                |
| ENST00000467084 <sup>3</sup> | MRPS24-204     | other  | UP                                 | 5                                                             | anti                |
| ENST00000263904              | STAM2-201      | mRNA   | UP                                 | 5                                                             | anti                |
| MSTRG.4929.1 <sup>+</sup>    | MSTRG.4929.1   | other  | UP                                 | 4                                                             | anti                |
| MSTRG.25279.17               | MSTRG.25279.17 | other  | DOWN                               | 4                                                             | anti                |
| MSTRG.13868.10               | MSTRG.13868.10 | other  | UP                                 | 4                                                             | anti                |
| MSTRG.11556.1                | MSTRG.11556.1  | other  | UP                                 | 4                                                             | anti                |
| MSTRG.113480.9               | MSTRG.113480.9 | other  | UP                                 | 4                                                             | anti                |
| ENST00000534295              | SCUBE2-213     | other  | UP                                 | 4                                                             | anti                |
| ENST00000513854 <sup>1</sup> | HSD17B11-207   | lncRNA | UP                                 | 4                                                             | anti                |
| ENST00000475661              | RN7SL105P-201  | other  | UP                                 | 4                                                             | anti                |
| ENST00000344450 <sup>3</sup> | DUSP22-201     | mRNA   | UP                                 | 4                                                             | Anti, lost          |
| ENST00000341744              | PMEPA1-202     | mRNA   | UP                                 | 4                                                             | anti                |
| ENST00000341165              | NBR1-201       | mRNA   | UP                                 | 4                                                             | anti                |
| ENST00000300087              | DCTN5-201      | mRNA   | UP                                 | 4                                                             | anti                |
| ENST00000273398              | ATP6V1A-201    | mRNA   | UP                                 | 4                                                             | anti                |
| ENST00000270139              | IFNAR1-201     | mRNA   | DOWN                               | 4                                                             | anti                |
| ENST00000164227 <sup>3</sup> | BCL3-201       | mRNA   | UP                                 | 4                                                             | anti                |
| MSTRG.60476.21               | MSTRG.60476.21 | other  | DOWN                               | 3                                                             | anti                |
| MSTRG.58791.9 <sup>1</sup>   | MSTRG.58791.9  | lncRNA | UP                                 | 3                                                             | anti                |
| MSTRG.52480.5 <sup>3</sup>   | MSTRG.52480.5  | other  | UP                                 | 3                                                             | anti                |
| MSTRG.19362.1                | MSTRG.19362.1  | other  | DOWN                               | 3                                                             | anti                |
| MSTRG.13021.1 <sup>+</sup>   | MSTRG.13021.1  | other  | DOWN                               | 3                                                             | anti                |
| MSTRG.107593.1               | MSTRG.107593.1 | other  | DOWN                               | 3                                                             | anti                |
| MSTRG.105806.1               | MSTRG.105806.1 | other  | UP                                 | 3                                                             | anti                |
| MSTRG.105004.1               | MSTRG.105004.1 | other  | DOWN                               | 3                                                             | anti                |
| ENST00000598608              | MED26-204      | mRNA   | DOWN                               | 3                                                             | anti                |

|                              |                |        |      |   |      |
|------------------------------|----------------|--------|------|---|------|
| ENST00000558841 <sup>3</sup> | MAPK6-204      | other  | DOWN | 3 | anti |
| ENST00000473381              | UBASH3A-204    | mRNA   | DOWN | 3 | anti |
| ENST00000466342 <sup>3</sup> | SQSTM1-206     | lncRNA | UP   | 3 | anti |
| ENST00000405362              | CACYBP-202     | mRNA   | UP   | 3 | anti |
| ENST00000397128              | PRKAA1-204     | mRNA   | DOWN | 3 | anti |
| ENST00000381647 <sup>+</sup> | C5orf51-201    | mRNA   | UP   | 3 | anti |
| ENST00000377294              | ZKSCAN4-201    | mRNA   | UP   | 3 | anti |
| ENST00000368130 <sup>1</sup> | AIM2-202       | mRNA   | UP   | 3 | anti |
| ENST00000358220 <sup>3</sup> | WDR37-202      | mRNA   | DOWN | 3 | anti |
| ENST00000296435              | CAMP-201       | mRNA   | DOWN | 3 | anti |
| ENST00000245817 <sup>3</sup> | TNFSF9-201     | mRNA   | UP   | 3 | anti |
| ENST00000218032              | TLR8-201       | mRNA   | UP   | 3 | anti |
| ENST00000559869              | AC025580.2-201 | lncRNA | DOWN | 8 | lost |
| ENST00000499292              | AC104078.1-201 | lncRNA | UP   | 8 | lost |
| ENST00000399036              | CCRL2-202      | mRNA   | UP   | 8 | lost |
| ENST00000614509              | AC106028.4-201 | lncRNA | DOWN | 7 | lost |
| ENST00000507282              | LPCAT1-204     | lncRNA | DOWN | 6 | lost |
| ENST00000479735              | ZEB2-221       | other  | UP   | 6 | lost |
| ENST00000434686              | GNB1-202       | mRNA   | DOWN | 6 | lost |
| MSTRG.7433.3                 | MSTRG.7433.3   | other  | UP   | 5 | lost |
| ENST00000496420              | PEX1-210       | lncRNA | DOWN | 5 | lost |
| ENST00000262109              | ERICH1-201     | mRNA   | DOWN | 5 | lost |
| ENST00000242208 <sup>1</sup> | INHBA-201      | mRNA   | UP   | 5 | lost |
| MSTRG.62218.1                | MSTRG.62218.1  | other  | UP   | 4 | lost |
| MSTRG.106338.1 <sup>3</sup>  | MSTRG.106338.1 | other  | UP   | 4 | lost |
| ENST00000584377 <sup>3</sup> | CSNK1D-222     | lncRNA | UP   | 4 | lost |
| ENST00000460254 <sup>3</sup> | CERK-203       | other  | UP   | 4 | lost |
| ENST00000369443 <sup>+</sup> | GDAP2-202      | mRNA   | UP   | 4 | lost |
| ENST00000263849              | ZC2HC1A-201    | mRNA   | UP   | 4 | lost |
| ENST00000252818              | JUND-201       | mRNA   | DOWN | 4 | lost |
| MSTRG.53369.1                | MSTRG.53369.1  | other  | UP   | 3 | lost |
| MSTRG.520.10                 | MSTRG.520.10   | other  | DOWN | 3 | lost |
| ENST00000606802              | AL139423.1-201 | lncRNA | DOWN | 3 | lost |
| ENST00000564747              | GTF3C1-205     | lncRNA | UP   | 3 | lost |
| ENST00000539605              | ANKLE2-207     | lncRNA | DOWN | 3 | lost |
| ENST00000497849              | VIM-208        | mRNA   | DOWN | 3 | lost |
| ENST00000428670 <sup>+</sup> | ATP2B1-204     | mRNA   | DOWN | 3 | lost |
| ENST00000265295 <sup>1</sup> | SPDL1-201      | mRNA   | UP   | 3 | lost |

|                             |                |        |      |   |      |
|-----------------------------|----------------|--------|------|---|------|
| ENST00000258455             | MRPS9-201      | mRNA   | UP   | 9 | gain |
| MSTRG.108677.1 <sup>1</sup> | MSTRG.108677.1 | other  | UP   | 8 | gain |
| ENST00000379485             | KBTBD6-201     | mRNA   | UP   | 8 | gain |
| ENST00000373768             | NDUFA8-201     | mRNA   | UP   | 8 | gain |
| ENST00000369167             | HIST2H2BF-201  | mRNA   | DOWN | 8 | gain |
| ENST00000397477             | CPSF1P1-201    | other  | DOWN | 7 | gain |
| ENST00000374987             | APEX2-201      | mRNA   | UP   | 7 | gain |
| ENST00000314134             | SLC35C1-201    | mRNA   | DOWN | 7 | gain |
| ENST00000272645             | POLR2D-201     | mRNA   | UP   | 7 | gain |
| ENST00000221132             | TNFRSF10A-201  | mRNA   | UP   | 7 | gain |
| MSTRG.95138.1               | MSTRG.95138.1  | other  | DOWN | 6 | gain |
| MSTRG.5940.7                | MSTRG.5940.7   | other  | DOWN | 6 | gain |
| ENST00000619039             | PIP4K2B-204    | mRNA   | UP   | 6 | gain |
| ENST00000375749             | POFUT1-202     | mRNA   | UP   | 6 | gain |
| ENST00000261772             | AARS-201       | mRNA   | UP   | 6 | gain |
| ENST00000370508             | GOT1-201       | mRNA   | UP   | 5 | gain |
| MSTRG.84882.11              | MSTRG.84882.11 | other  | UP   | 4 | gain |
| ENST00000378230             | CEP104-202     | mRNA   | UP   | 4 | gain |
| ENST00000216038             | RTCB-201       | mRNA   | DOWN | 4 | gain |
| MSTRG.15670.1 <sup>1</sup>  | MSTRG.15670.1  | other  | UP   | 3 | gain |
| ENST00000587128             | AC006213.2-201 | lncRNA | DOWN | 3 | gain |
| ENST00000557275             | SYNE3-205      | mRNA   | UP   | 3 | gain |
| ENST00000343629             | TLDC1-201      | mRNA   | UP   | 3 | gain |

<sup>+</sup>: the transcript belongs to the common hub nodes of immune-related functional network in ABPA and AS.

<sup>1</sup>: the transcript exists in the cluster 3 of cluster analysis in Figure 5A.

<sup>3</sup>: the transcript exists in the cluster 3 of cluster analysis in Figure 5E.

**Table S9. RNA-RNA interactions involved in hub nodes validated by GEO datasets.**

| Hub node        | Target          | PCC value in GEO dataset | GEO dataset   |
|-----------------|-----------------|--------------------------|---------------|
| ENST00000595806 | ENST00000323570 | 0.538                    | GSE2125       |
|                 | ENST00000216484 | 0.689                    | GSE2125       |
| ENST00000369443 | ENST00000304222 | 0.666                    | GSE 473-GPL96 |
|                 | ENST00000283147 | 0.559                    | GSE 473-GPL96 |
| ENST00000327423 | ENST00000426654 | 0.679                    | GSE 473-GPL96 |
|                 | ENST00000261250 | 0.528                    | GSE 473-GPL96 |

**Supplementary File 1:** Fisher Exact probability test identified specific variants occurred in distinct groups.

**Supplementary File 2:** Two statistical methods identified significant differential enrichment of specific SSRs among those different samples.
